# Supplementary material for: Enzyme-triggeredin situformation of Ag nanoparticles with oxidase-mimicking activity for amplified detection of alkaline phosphatase activity
Source: Royal Society of Chemistry journal article supplement (doi:10.1039/c9an00105k), 2019-01-01
Supplement: c9an00105k1.pdf [file c9an00105k1.pdf]

Supplementary Information for

**Enzyme-triggered in-situ formation of Ag nanoparticles with  
oxidase-mimicking activity for amplified detection of  
alkaline phosphatase activity**

Hongwei Song,<sup>a</sup> Zhibo Li,<sup>b</sup> Yinxian Peng,<sup>a,\*</sup> Xin Li,<sup>b</sup> Xuechao Xu,<sup>b</sup> Jianming Pan,<sup>b</sup>

Xiangheng Niu<sup>b,\*</sup>

<sup>a</sup> School of Environmental and Chemical Engineering, Jiangsu University of Science and Technology, Zhenjiang 212003, China

<sup>b</sup> Institute of Green Chemistry and Chemical Technology, School of Chemistry and Chemical Engineering, Jiangsu University, Zhenjiang 212013, China

\* Corresponding author. E-mail: pyxhx@just.edu.cn; niuxiangheng@126.com

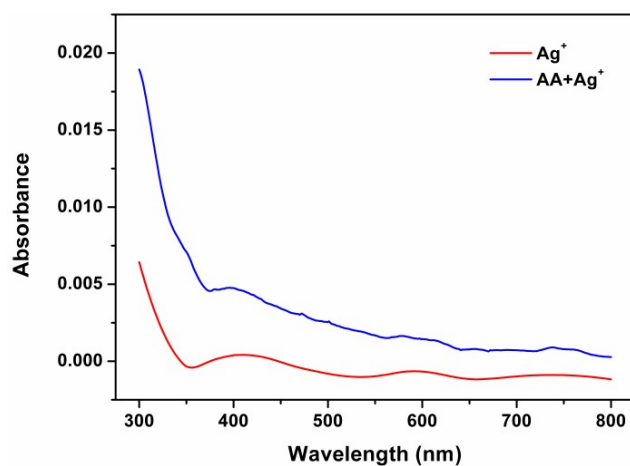

**Figure S1.** UV-Vis spectra of  $\text{Ag}^+$  and  $\text{AA}+\text{Ag}^+$ .

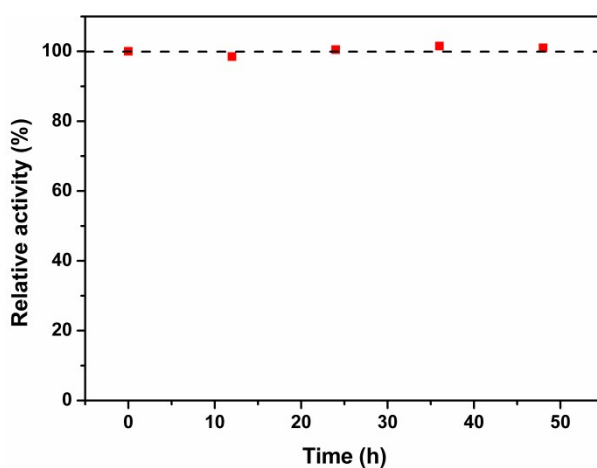

**Figure S2.** Oxidase-like activity stability of the in-situ formed Ag NPs.

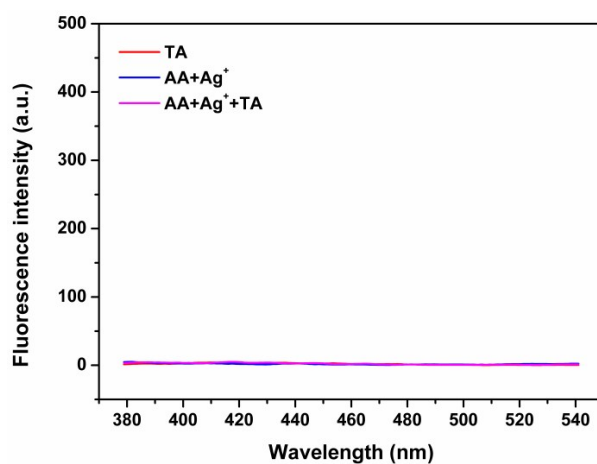

**Figure S3.** Fluorescence spectra of different systems.

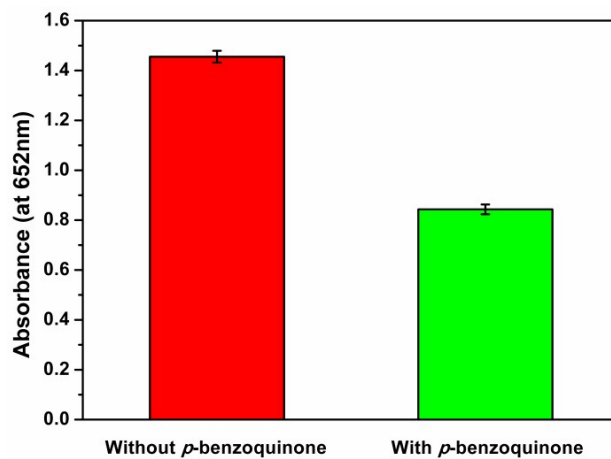

**Figure S4.** UV-Vis absorbance of the AA+Ag<sup>+</sup>+TMB system with/without the addition of *p*-benzoquinone.

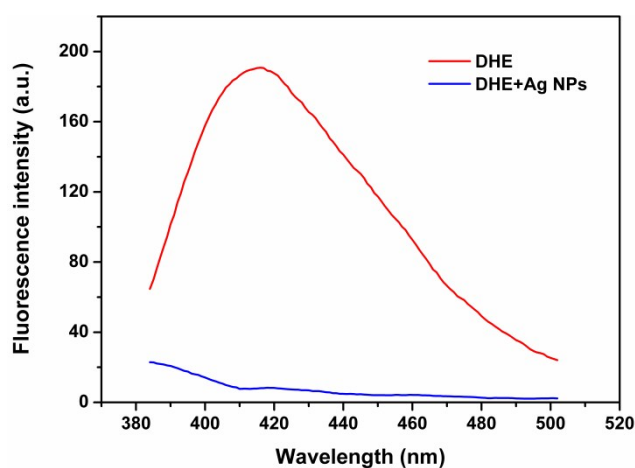

**Figure S5.** Fluorescence spectra of different systems.

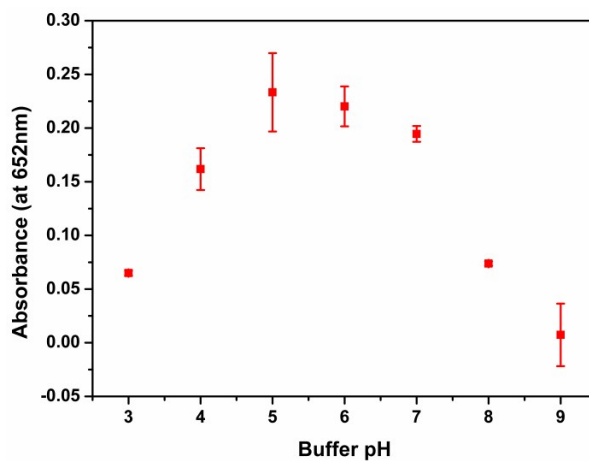

**Figure S6.** Effect of buffer pH on the oxidase-mimicking activity of the in-situ

formed Ag NPs.

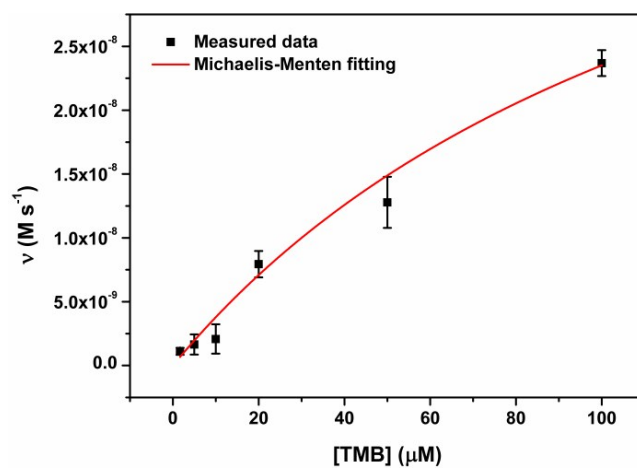

**Figure S7.** Steady kinetic measurements of  $\text{Ag}^+$  with low oxidase-like activity toward the TMB substrate.

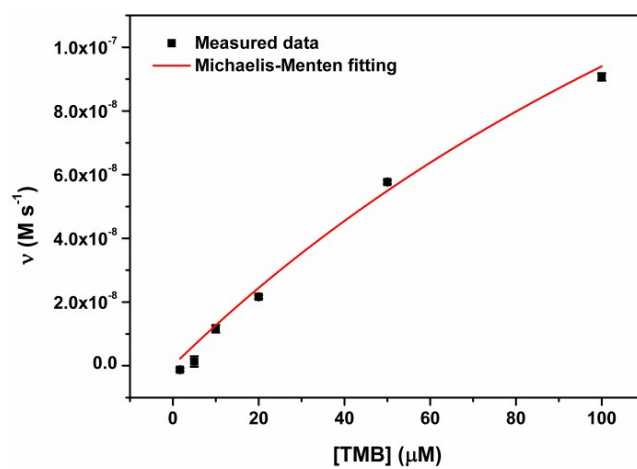

**Figure S8.** Steady kinetic measurements of the in-situ formed Ag NPs with high oxidase-like activity toward the TMB substrate.

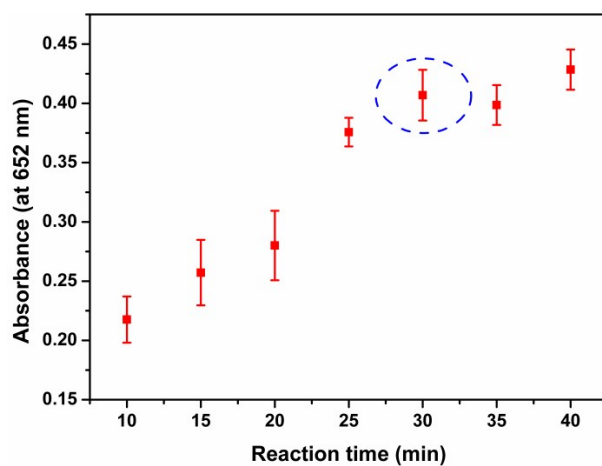

**Figure S9.** Effect of the reaction time of AAP+ALP+Ag<sup>+</sup> on the detection of ALP activity.

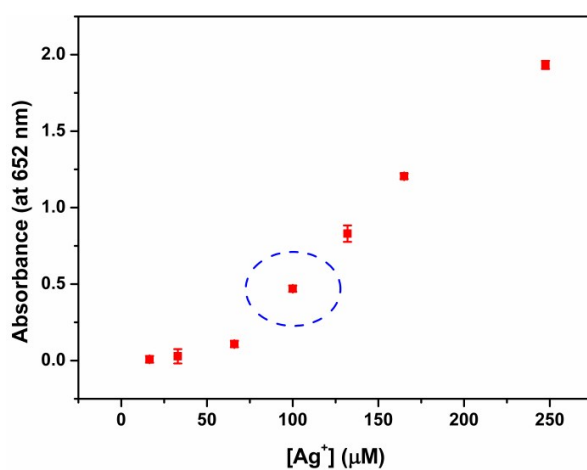

**Figure S10.** Effect of Ag<sup>+</sup> concentration on the detection of ALP activity.

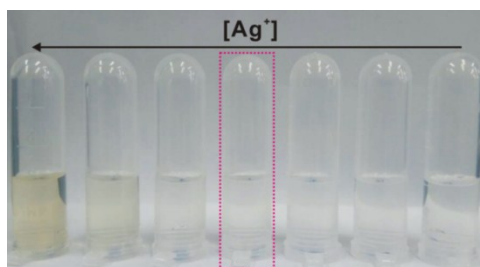

**Figure S11.** Photograph of the AAP+ALP+Ag<sup>+</sup> system with different concentrations of Ag<sup>+</sup>.

**Table S1.** Performance comparison of different methods for ALP activity detection.

| <b>Material</b>                     | <b>Method</b> | <b>Linear range<br/>(U L<sup>-1</sup>)</b> | <b>LOD<br/>(U L<sup>-1</sup>)</b> | <b>Ref.</b> |
|-------------------------------------|---------------|--------------------------------------------|-----------------------------------|-------------|
| Coumarin@Tb-GMP ICPNPs              | Fluorescent   | 25~200                                     | 10                                | [1]         |
| PDA-NDs                             | Fluorescent   | 1~50                                       | 0.94                              | [2]         |
| Fmoc-K(FITC)FFY                     | Fluorescent   | 0~2,800                                    | 60                                | [3]         |
| Cu(BPDS) <sub>2</sub> <sup>2-</sup> | Colorimetric  | 0~200                                      | 1.75                              | [4]         |
| HCAP                                | Fluorescent   | 0~150                                      | 0.15                              | [5]         |
| DNA/AgNCs                           | Fluorescent   | 30~240                                     | 5                                 | [6]         |
| Fe(II)-phenanthroline               | Colorimetric  | 0~220                                      | 0.94                              | [7]         |
| CQDs                                | Fluorescent   | 4.6~383.3                                  | 1.4                               | [8]         |
| APBA-Au NCs                         | Fluorescent   | 0.02~2                                     | 0.005                             | [9]         |
| G <sub>20</sub> -Cu(II)             | Colorimetric  | 20~200                                     | 0.84                              | [10]        |
| In-situ formed Ag NPs               | Colorimetric  | 0.15~5                                     | 0.037                             | This work   |

## References

- [1] J. J. Deng, P. Yu, Y. X. Wang and L. Q. Mao, *Anal. Chem.*, 2015, **87**, 3080-3086.
- [2] Q. Xue, X. Y. Cao, C. L. Zhang and Y. Z. Xian, *Microchim. Acta*, 2018, **185**, 231.
- [3] L. Dong, Q. Q. Miao, Z. J. Hai, Y. Yuan and G. L. Liang, *Anal. Chem.*, 2015, **87**, 6475-6478.
- [4] Q. Hu, M. H. He, Y. Q. Mei, W. J. Feng, S. Jing, J. M. Kong and X. J. Zhang,

*Talanta*, 2017, **163**, 146-152.

[5] Z. G. Song, R. T. K. Kwok, E. G. Zhao, Z. K. He, Y. N. Hong, J. W. Y. Lam, B. Liu and B. Z. Tang, *ACS Appl. Mater. Interfaces*, 2014, **6**, 17245-17254.

[6] J. L. Ma, B. C. Yin, X. Wu and B. C. Ye, *Anal. Chem.*, 2016, **88**, 9219-9225.

[7] Q. Hu, B. J. Zhou, P. Y. Dang, L. Z. Li, J. M. Kong and X. J. Zhang, *Anal. Chim. Acta*, 2017, **950**, 170-177.

[8] Z. S. Qian, L. J. Chai, C. Tang, Y. Y. Huang, J. R. Chen and H. Feng, *Anal. Chem.*, 2015, **87**, 2966-2973.

[9] Q. Liu, H. X. Li, R. Jin, N. Li, X. Yan and X. G. Su, *Sens. Actuators, B*, 2019, **281**, 175-181.

[10] J. J. Yang, L. Zheng, Y. Wang, W. Li, J. L. Zhang, J. J. Gu and Y. Fu, *Biosens. Bioelectron.*, 2016, **77**, 549-556.
